# Supplementary material
Source: PubMed Central journal article supplement (PMC5374071)
Supplement: jciinsight-2-90111-s001.pdf [file jciinsight-2-90111-s001.pdf]

## Specific inhibition of Btk blocks pathogenic plasma cell signatures and myeloid cell-associated kidney damage in IFN $\alpha$ -driven lupus nephritis

Arna Katewa,<sup>1</sup> Yugang Wang,<sup>1</sup> Jason A. Hackney,<sup>2</sup> Tao Huang,<sup>1</sup> Eric Suto,<sup>3</sup> Nandhini Ramamoorthi,<sup>4</sup> Cary D. Austin,<sup>5</sup> Meire Bremer,<sup>6</sup> Jacob Zhi Chen,<sup>7</sup> James J. Crawford,<sup>8</sup> Kevin S. Currie,<sup>9</sup> Peter Blomgren,<sup>9</sup> Jason DeVoss,<sup>3</sup> Julie A. DiPaolo,<sup>10</sup> Jonathan Hau,<sup>11</sup> Adam Johnson,<sup>12</sup> Justin Lesch,<sup>3</sup> Laura E. DeForge,<sup>12</sup> Zhonghua Lin,<sup>3</sup> Marya Liimatta,<sup>12</sup> Joseph W. Lubach,<sup>11</sup> Sami McVay,<sup>12</sup> Zora Modrusan,<sup>13</sup> Allen Nguyen,<sup>12</sup> Chungkee Poon,<sup>1</sup> Jianyong Wang,<sup>12</sup> Lichuan Liu,<sup>14</sup> Wyne P. Lee,<sup>3</sup> Harvey Wong,<sup>7</sup> Wendy B. Young,<sup>8</sup> Michael J. Townsend,<sup>4</sup> and Karin Reif<sup>1</sup>

<sup>1</sup>Departments of Immunology Discovery, <sup>2</sup>Bioinformatics and Computational Biology, <sup>3</sup>Translational Immunology, <sup>4</sup>Biomarker Discovery OMNI, <sup>5</sup>Pathology, <sup>6</sup>Biomarker Development, <sup>7</sup>Drug Metabolism and Pharmacokinetics, <sup>8</sup>Discovery Chemistry, at Genentech, South San Francisco, California, USA. <sup>9</sup>Gilead Sciences, Seattle, Washington, USA. <sup>10</sup>Gilead Sciences, Foster City, California, USA. <sup>11</sup>Small Molecule Pharmaceutical Sciences, <sup>12</sup>Biochemical and Cellular Pharmacology, <sup>13</sup>Molecular Biology, <sup>14</sup>Clinical Pharmacology at Genentech, South San Francisco, California, USA.

**Correspondence:** Michael Townsend Ph.D., Research & Early Development Genentech, 1 DNA Way, South San Francisco, CA 94080, [townsem1@gene.com](mailto:townsem1@gene.com); Karin Reif Ph.D., KARBio, San Francisco, CA, [KARBioSF@gmail.com](mailto:KARBioSF@gmail.com)

### Conflict of interest statement

All authors are or were employed by Genentech Inc. at the time of the study and hold equity in the Roche Group. In addition, the research in this manuscript was fully funded by Genentech Inc.

## Supplemental Methods

### ***SelectScreen® profiling service***

The vendor (Invitrogen-Life Technologies) offered two types of kinase activity assays, a peptide phosphorylation assay (Z'-LYTE®) and an ADP quantitation assay (Adapta®), as well as a kinase ATP-site competitive binding assay (LanthaScreen®). For kinases that were inhibited close to or >50% by 1  $\mu$ M G-744, the vendor carried out 10-point inhibitor titrations using the same assays in order to determine the concentrations of G-744 that caused 50% inhibition ( $IC_{50}$ ). In Table 1, kinases were run in Z'-LYTE activity assay format except EphA7 and SLK which were run in LanthaScreen binding assay format. The ATP concentrations used in the activity assays were typically within 2-fold of the experimentally determined apparent Michaelis constant ( $K_m$ ) value for each kinase, whereas the competitive binding tracer concentrations used in the binding assays were generally within 3-fold of the experimentally determined dissociation constant ( $K_d$ ) values.

### ***p100/p52 ratio by Western blot***

Purified murine B cells were pre-incubated with G-744 for 60 min and stimulated with BAFF (500 ng/ml) at 37°C for 16 hours. Cell lysates were prepared using RIPA buffer (Thermo Scientific). Proteins from lysates were separated on 10% SDS-PAGE gels and transferred onto Nitrocellulose membrane (Millipore) by standard techniques. Membranes were blocked and then probed with anti-NF $\kappa$ B2

(p100/p52) rabbit polyclonal (Cell Signaling) and anti-p38 mouse monoclonal Ab as loading control followed by goat anti-rabbit IgG IRDye800CW and goat anti-mouse IgG AlexaFluor680 (Licor Biosciences). Signals were detected with an Odyssey Infrared Imager (Li-Cor Biotechnology) and analyzed with the manufacturer's software.

### ***B cell subset analyses in mice***

For assessment of B cell populations in C57/BL6 mice, splenocytes were harvested 7 days after twice daily (BID) oral drug treatment and analyzed by flow cytometry. Antibodies used for these analyses were murine reactive CD21-FITC, B220-FITC, CD3-PerCPCy5.5, CD11b-PerCPCy5.5, Gr1-PerCPCy5.5, B220-PerCP, CD23-PECy7, B220-AlexFluor700, IgD-BV510 (all from BD Bioscience); IgM-Dylight649 (Jackson ImmunoResearch Laboratories Inc); CD93-PE (eBioscience).

### ***In vitro whole blood pBTK assays***

Heparinized human whole blood or murine whole blood was treated with G- 744 at 37°C as indicated in 0.4%DMSO for 6hr or 1h, respectively. Blood was lysed with 2X lysis buffer (Cell Signaling Technology) containing protease (Roche Applied Science) and phosphatase inhibitors (cocktail II and III) (Sigma). Phosphorylation of Btk at the Y223 residue was evaluated using Meso Scale Discovery (MSD) technology as described for purified B cells.

### ***In vitro whole blood FcεRI/CD63 assay***

Whole blood CD63 assays were performed using the Basotest (Orpegen Pharma) according to the manufacturer's instructions.

### ***Spontaneous NZB/W1 lupus models***

NZB/W\_F1 hybrids are genetically predisposed to develop severe lupus-like phenotypes comparable to that seen in lupus patients including hemolytic anemia, proteinuria, and progressive IC glomerulonephritis (1). They spontaneously develop anti-nuclear autoantibodies at 16 to 20 weeks, LN between 20 and 44 weeks of age and death from end stage renal disease occurs between 36 and 54 weeks of age. At 32 weeks of age mice were treated as indicated with vehicle or drugs.

### ***Serum antibody ELISAs***

Total Ig (IgG, IgA, IgM) autoantibodies against mouse nuclear antigens were quantified by mouse anti-nuclear antigens Ig's ELISA kit from Alpha Diagnostic International, according to the manufacture's protocol.

Serum IgG against dsDNA (but not ssDNA) were detected by ELISA using calf thymus DNA coated plates (Sigma) and detection with HRP-conjugated goat anti-mouse IgG antibody. Pooled sera from aged or young NZB/W\_F1 mice served as controls. The absorbance of the negative control was multiplied by a factor of three to yield a cut-off. The log titer for each sample was calculated as the log of

the dilution needed to reach the absorbance of the cut-off point. A value of 3 means a 1:1000 dilution was required to reach this point. Given the minimum sample dilution of 1/25, the minimum quantifiable log titer value was 1.4.

Isotype IgM and IgG3 autoantibodies against dsDNA were detected by ELISA using mouse anti-dsDNA IgM and anti-dsDNA IgG3 ELISA kits from Alpha Diagnostic International. Serum samples were diluted in low non-specific binding sample diluent (1:50 fold dilution for anti-dsDNA IgM and 1:35 fold dilution for anti-dsDNA IgG3) and ELISAs were performed according to the manufacturer's protocol. These assays did not detect anti-ssDNA antibodies.

Total Ig (IgG, IgA, IgM) autoantibodies against Histone were quantified by ELISA (Alpha Diagnostic International).

Serum total Ig isotypes (IgM, IgG1, IgG2a, IgG2b, IgG3) were detected by Luminex using Mouse Immunoglobulin Isotyping Magnetic Panel (EMD Millipore).

Serum samples were diluted 1:10000 fold in assay buffer and simultaneous detection of Igs was performed according the manufacturer's protocol.

### ***Flow cytometry***

Cells were incubated with anti-CD16/CD32 (Fc block, clone 2.4G2; BD Bioscience) plus 2% normal mouse and normal rat serum and stained with various combinations of the following Abs in FACS buffer (PBS containing 2% FBS, 2 mM EDTA, and 0.1% NaN<sub>3</sub>) for 30 min at 4°C. Murine reactive CD38-FITC, CD44-FITC, B220-FITC, CD69-PE, CD86-PE, CD138-PE, CD3-

PerCPCy5.5, CD5-PerCPCy5.5, B220-PerCP, ICOS-PECy7, CD4-PB, B220-PB, B220-AlexFluor700, IgD-BV510, CD8-APC, Ki67-APC (all from BD Bioscience); IgM-Dylight649 (Jackson ImmunoResearch Laboratories Inc); IgG2a FITC, IgG2b-PECy7, IgG1-APCCy7 (all from Southern Biotech). Human plasmablasts were stained with human-reactive anti-CD20 FITC or anti-CD38 APC (BD Biosciences) mAbs. Isotype-matched mAbs were used as control. Dead cells were excluded with Sytox Blue (Life Technologies) or propidium iodide (Sigma). Samples were analyzed by flow cytometry using a LSR II or FACS Calibur instrument (BD Biosciences). Cell subsets were identified as described in the figure legends.

### ***Histological Staining and Scoring***

Four-micron tissue sections were evaluated. Kidney sections were stained with Periodic acid–Schiff (PAS) for evaluation of glomerulonephritis, and hematoxylin and eosin (H&E) for evaluation of periarteritis by light microscopy.

Glomerulonephritis severity scoring was on a 4 point semiquantitative scale: “0” – normal or mild global lesions in <50% of glomeruli, “1” - global lesions in >50% of glomeruli, <20% of which are severe (defined as >1 segment with <3 patent capillaries), “2” - global lesions in >50% of glomeruli, 20-80% of which are severe, and “3” - >80% of glomeruli with severe global lesions. Periarteritis severity scoring was on a 4 point semiquantitative scale: “0” – no significant inflammation, “1” – sparse or focal periarterial inflammatory infiltrates, “2” – occasional

moderate sized non-circumferential perivascular inflammatory infiltrates, and “3” – frequent large perivascular inflammatory infiltrates, often circumferential.

Glomerular and tubular immunoglobulin fluorescence signals were separately scored in a blinded fashion using a visual semiquantitative 4-point scale: “0” – negative; “1” – low/infrequent signal; “2” – moderately frequent and/or intense signal; “3” – high/frequent signal.

Splenic GC recognized as well-circumscribed clusters of at least 5 PNA<sup>+</sup> cells were enumerated on one whole splenic section per animal. To evaluate splenic B cell follicular structure, 5  $\mu$ m acetone-fixed sections obtained from frozen spleen were subjected to sequential 3-color immunofluorescence using biotinylated rat anti-mouse CD4 antibody (Clone RM4-5, Pharmingen), streptavidin-Alexafluor 546 for 30 min (Life Technologies), rat anti-mouse MOMA-1-FITC (AbD Serotec), and goat anti-mouse IgM-AMCA (Vector Labs).

### ***RNA sequencing and differential expression analyses***

RNA from frozen spleen and kidney were isolated by disrupting the tissues in RLT buffer using a tissue lyser and then extracting RNA using the RNeasy mini kit (Qiagen) including the on-column DNase digestion. Total RNA concentration and RNA integrity of samples was determined using the NanoDrop 8000 (Thermo Scientific) and the Fragment Analyzer with High Sensitivity RNA kit (Advanced Analytical), respectively.

Libraries were made from 1 µg total spleen or kidney RNA each using the TruSeq RNA Sample Preparation Kit v2 (Illumina). Generated libraries were amplified with 8 cycles of PCR. The size of the libraries was confirmed using a Fragment Analyzer and High Sensitivity DNA NGS kit (Advanced Analytical) and their concentration was determined by a qPCR-based method using the KAPA Library quantification kit. The libraries were multiplexed and sequenced on HiSeq2500 (Illumina) using manufacturer's recommendations. The raw RNA-sequencing reads and normalized data are available from GEO under accession number GSE72410.

Bioinformatic analyses were performed using custom scripts written in the R programming language (<http://r-project.org>), using packages from the Bioconductor project (<http://bioconductor.org>). Demultiplexed RNA sequencing reads were processed using the HTSeqGenie package (version 3.14.2). Reads were aligned to the reference mouse genome sequence (NCBI Build 37) using the GSNAP algorithm (2) version 2013-10-10. Uniquely aligned read pairs that fell within exons were tallied to estimate gene expression levels. For inclusion, genes were required to have >10 reads in  $\geq 4$  samples.

To determine differential expression of genes, we used the DESeq2 algorithm to fit a negative binomial generalized linear model, using the default parameters. To control for multiplicity of testing, p-values were adjusted using the Benjamini-Hochberg method. For heat maps, the count data were transformed using the variance-stabilizing transformation implemented in DESeq2. Genes were



centered and scaled to unit variance, and hierarchical clustering was performed using Euclidean distance and Ward linkage.

### ***QT PCR using Fluidigm***

RNA from murine blood was isolated using Trizol and further purified using the RNEasy mini kit (Qiagen). cDNA synthesis was performed on 200 ng total-RNA using an iScript cDNA synthesis kit (Biorad). Gene-specific pre-amplification was performed (Applied Biosystems) of 117 genes including housekeeping genes HPRT1, b-Actin, RPL19 and GAPDH (Supplemental Table 2). RT-PCR was performed using the BioMark 96.96 Dynamic Arrays (Fluidigm Corporation) using the manufacturer's protocol. Data were collected using the BioMark Data Collection Software and CT values were obtained using the BioMark RT-PCR Analysis Software (V.2.1.1, Fluidigm). The relative abundance (dCt) to RPL19 (the most stable housekeeping gene) was calculated:  $2\log(\text{average Ct gene} - \text{average Ct RPL19})$ . For statistical analyses, values below the lower limit of detection were set to be 1 Ct lower than the lowest recorded value.

All statistical analyses were performed using custom scripts written in the R programming language. To identify genes affected by Btk inhibition, we used the limma R package to fit a linear model for each gene, calculating the fold change between baseline (8 month old NZB/W\_F1) samples to one or three month post drug treatment samples. Genes were considered to be significantly affected by

treatment if they were decreased by at least 1.5-fold compared to 36-week old mice, with an adjusted p-value less than 0.05.

### ***Survival assays with differentiated plasmablast and plasma cells***

Memory B cells were differentiated using CpG or R848, IL-2, IL-10, IL-15, IL-6, IFN $\alpha$  for 4 days followed by culturing the cells in IL-2, IL-10, IL-15, IL-6, IFN $\alpha$  and IL-21 for 10 days. Cells were sorted on day 14 using anti-CD38 and anti-CD138 antibodies to detect plasmablasts and plasma cells, respectively. Sorted plasma cells and plasmablasts were then treated with either DMSO or G-744 at IC<sub>90</sub> concentration (650 nM) for 48 h and cell survival was assessed by flow cytometry using Annexin and Propidium Iodide.

### ***Btk RNA expression in B cell-lineage cells***

Total RNA from FACS-sorted B cell subsets (naïve, memory and plasmablasts) were isolated with the RNeasy kit using on-column DNase I digestion (QIAGEN) followed by cDNA synthesis using iScript cDNA synthesis kit (Bio-rad laboratories). Taqman quantitative RT-PCR was then performed, according to the manufacturer's instructions (Applied Biosystems) and run using a 7900HT Fast Real Time PCR system (Applied Biosystems). The samples were run in triplicate reactions and were analyzed for expression of Btk and results were normalized to HPRT1. The values were plotted as Btk expression  $2^{-\Delta\Delta CT}$  normalized to HPRT1.

## Supplemental Tables

### Supplemental Table 1

Invitrogen kinase selectivity (% Inhibition at 1  $\mu$ M [IC<sub>50</sub>, nM])

| Kinase            | G-7744    | P606-15  | FN486      | Ibrutinib  | PF-112    | Kinase        | G-7744    | P606-15   | FN486      | Ibrutinib  | PF-112 |
|-------------------|-----------|----------|------------|------------|-----------|---------------|-----------|-----------|------------|------------|--------|
| Abi               | -1        | 15       | 42         | 39         | -18       | EphA7         | 83 [548]  | 24        | 9          | 18         | -3     |
| ACVR1B            | -5        | -3       | 1          | 0          | 6         | EphA8         | 1         | 14        | 9          | 48         | 11     |
| ACVR2B            |           | 1        | 7          | 2          | -1        | EphB1         | 4         | 25        | 6          | 7          | 4      |
| AKT1              | 4         | 1        | 2          | 8          | 6         | EphB2         | 1         |           |            |            |        |
| AKT2              | 2         | 1        | 24         | 3          | 7         | EphB3         | 1         | -1        | 3          | 3          | 1      |
| AKT3              | 6         |          |            |            |           | EphB4         | 0         |           |            |            |        |
| ALK2              | -1        | -2       | 14         | 14         | -5        | ErbB2         | 54 [1750] | 6         | -11        | 91 [32.7]  | -7     |
| Arg               | 4         |          |            |            |           | ErbB4         | 0         | 22        | 14         | 93 [2.7]   | 97     |
| ARR5              | 14        | 69       | 10         | 2          | -13       | ERK1          | 7         |           |            |            |        |
| ASK1              | 14        | 5        | 4          | 5          | 0         | ERK2          | -1        | 27        | 0          | 11         | 9      |
| Aurora_A          | 3         | 9        | 14         | 45         | 32        | FAK           | 3         | 61        | 5          | -3         | 8      |
| Aurora_B          | 6         | -2       | 7          | 18         | 4         | FAK2          | 2         | 59 [587]  |            |            |        |
| Aurora_C          | 5         |          |            |            |           | Fer           | 9         |           |            |            |        |
| Axl               | 3         | 25       | 5          | 9          | 6         | Fes           | 4         | 55        | 13         | 5          | 3      |
| B-Raf             | 21        | 18       | 5          | 59         | 11        | FGFR1         | 9         | -3        | 54         | 53         | 40     |
| Brk               | -3        | 75       | 50         | 102 [40.5] | 54        | FGFR2         | 14        |           |            |            |        |
| BMPR1A            |           | 0        | 14         | -1         | 1         | FGFR3         | 7         | 10        | 35         | 31         | 22     |
| Bmx               | 49 [3333] | 46       | 89 [220]   | 99 [1.83]  | 96        | FGFR3(K650E)  | 15        |           |            |            |        |
| Brk               | 1         | 14       | 38         | 100 [16.5] | 92        | FGFR4         | -2        | 4         | 29         | 22         | 14     |
| BrSK1             | 3         | 10       | 5          | 1          | 5         | Fgr           | 53 [1111] | 78        | 100 [70.8] | 103 [2.63] | 53     |
| BTk               | 95 [1.77] | 69 [616] | 101 [3.56] | 101 [0.55] | 99 [1.92] | Flt1          | 2         | 1         | 16         | 22         | 8      |
| CaMKI             | 8         | 57       | 10         | -7         | 19        | Flt3          | -6        | 61 [792]  | 24         | 86         | 25     |
| CaMKI_delta       | 8         | 25       | 12         | 6          | 5         | Flt3(D835Y)   | 7         |           |            |            |        |
| CaMKII_alpha      | -7        | 10       | 4          | -2         | -1        | Flt4          | 13        | 18        | 56         | 69         | 27     |
| CaMKII_beta       | 12        | 9        | 0          | 13         | 6         | Ftk           | 9         | 57        | 37         | 88 [44.1]  | 19     |
| CaMKII_delta      | 3         |          |            |            |           | Fyn           | 6         | 53 [1010] |            |            |        |
| CamKIV            | -5        | 33       | 3          | 8          | 2         | GCK           | 8         | 78 [275]  |            |            |        |
| CAMKK1            | 4         | -6       | -3         | -12        | 1         | GRK2          | 14        | 1         | 1          | -5         | 0      |
| CAMKK2            | -7        | 3        | 8          | -1         | 1         | GRK3          | 16        | 1         | 3          | -5         | -4     |
| CDK1/cyclinB      | 1         | 24       | 7          | 6          | -2        | GRK4          | -4        |           |            |            |        |
| CDK2/cyclinA      | -4        | 60 [789] | -1         | 2          | 3         | GRK5          | -5        | 2         | -1         | -1         | -1     |
| CDK5/p25          | 2         | 50       | 1          | 2          | 4         | GRK6          | -1        | 8         | 9          | 1          | -2     |
| CDK5/p35          | 3         |          |            |            |           | GRK7          | 3         |           |            |            |        |
| CDK7/cyclinH      | -11       | 34       | 5          | -20        | 5         | GSK3_alpha    | 4         | 19        | 7          | 15         | 7      |
| CDK8/cyclinC      | -1        | 2        | 9          | 14         | 6         | GSK3_beta     | -5        | 12        | -2         | -1         | 3      |
| CDK9/cyclinK      | 11        |          |            |            |           | Haspin        | -1        |           |            |            |        |
| CDK9/cyclinT1     | 11        | 26       | -7         | 1          | -14       | Hck           | 6         | 72        |            | 98 [27.6]  |        |
| CHK1              | 1         | 9        | 13         | 2          | 3         | HIPK1         | -2        | 1         | 0          | 0          | 1      |
| CHK2              | 1         | 48       | -4         | 12         | 10        | HIPK2         | -4        | 3         | 6          | 3          | 4      |
| CK1_alpha1        | 6         | 5        | 5          | 2          | 3         | HIPK4         | 11        | 8         | 4          | 5          | 5      |
| CK1_delta         | 0         | 46       | 3          | 8          | 5         | Hyl           | 4         | -2        | 1          | -1         | -5     |
| CK1_epsilon1      | 1         | 27       | 2          | 32         | 6         | IGF1R         | 3         | 60 [611]  | 15         | 8          | 4      |
| CK1_gamma1        | 5         | 2        | 5          | -3         | 4         | IKK_alpha     | -5        | 4         | 16         | -16        | 3      |
| CK1_gamma2        | 6         | 10       | 4          | 2          | 2         | IKK_beta      | 15        | 5         | 6          | 13         | 2      |
| CK1_gamma3        | -1        |          |            |            |           | IKK_epsilon   | 9         | 0         | 4          | 4          | 6      |
| CK2_alpha1        | 3         | 1        | 6          | 2          | 1         | InsR          | 6         | 31        | 7          | 9          | 0      |
| CK2_alpha2        | 4         |          |            |            |           | IRAK1         | -4        | 40        | 1          | 1          | -5     |
| CLK1              | 7         | 30       | 5          | -4         | 6         | IRAK4         | 6         | 43        | -9         | 14         | -10    |
| CLK2              | 4         | 53       | 10         | -2         | 2         | IRR           | 2         | 28        | 10         | 14         | 2      |
| CLK3              | 4         | -1       | 7          | 5          | 8         | Itk           | 6         | 8         | 16         | 81 [218]   | -4     |
| CLK4              |           | 78       | 13         | 6          | -5        | JAK1          | -2        | 43        | -4         | -2         | -1     |
| Cot               | 16        | 39       | 10         | 30         | 4         | JAK2          | -5        | 39        | 2          | 1          | -2     |
| CSF1R             | 6         | 69 [372] | 24         | 55         | 6         | JAK3          | -4        | 41        | -7         | 80 [240]   | -4     |
| CSK               | 4         | 11       | 22         | 98 [39.5]  | 34        | JNK1_alpha1   | 1         | 28        | 13         | 9          | 10     |
| DAPK1             | 1         | 47       | -29        | 27         | 13        | JNK2          | 12        | 5         | 16         | 5          | 3      |
| DCAMKL2           | 3         | -1       | 6          | 7          | 5         | JNK3          | 8         | 25        | 13         | 5          | 5      |
| DDR1              |           | -3       | 3          | 2          | 4         | KDR           | 7         | 7         | 32         | 66         | 27     |
| DDR2              | 1         |          |            |            |           | KHS1          | 7         | 26        | 10         | 17         | 12     |
| DMPK              | -4        | 66       | 7          | -6         | -1        | Kit           | -11       | 6         | 2          | 18         | -2     |
| DNA-PK            |           | 49       | 3          | 11         | 9         | Kit(T670I)    | 0         |           |            |            |        |
| DRAK1             | -5        | 6        | 8          | 4          | 4         | Kit(V654A)    | -7        |           |            |            |        |
| DYRK1A            | 5         | 4        | 1          | 4          | 5         | Lck           | 17        | 66 [494]  | 86 [398]   | 98 [3.64]  | 74     |
| DYRK1B            | 2         |          |            |            |           | LIMK1         | 9         | 2         | 47         | 41         | -2     |
| DYRK3             | 6         | 79       | 23         | 4          | 1         | LIMK2         | 6         |           |            |            |        |
| DYRK4             | 2         | 3        | 0          | -1         | -1        | LRRK2         | -1        | 71 [203]  | 3          | -3         | -16    |
| eEF-2K            | 2         | 6        | 1          | -3         | 11        | LRRK2(G2019S) | -15       |           |            |            |        |
| EGFR              | 17        | 26       | 3          | 89 [23.2]  | 11        | LTK           | 4         | 43        | -7         | 5          | -3     |
| EGFR(L858R)       | 23        |          |            |            |           | Lyn           | 7         | 81 [215]  | 50         | 97 [15.8]  | 62     |
| EGFR(T790M,L858R) |           | 79 [274] | 18         | 26         | 12        | LynB          | 18        |           |            |            |        |
| EphA1             | 3         | 42       | 10         | 30         | 11        | MAP4K4        | 4         | 76        | 7          | 12         | 25     |
| EphA2             | 16        | 13       |            |            |           | MAPKAPK2      | -5        | -1        | 15         | 8          | 6      |
| EphA3             | -7        | 12       | -1         | 12         | 2         | MAPKAPK3      | 4         | 3         | 40         | 1          | 6      |
| EphA4             | 3         |          |            |            |           | MARK1         | 1         | 9         | 7          | 9          | 5      |
| EphA5             | 1         |          |            |            |           | MARK2         | 10        |           |            |            |        |

Supplemental Table 1 (continued)

Invitrogen kinase selectivity (% Inhibition at 1  $\mu$ M [ $IC_{50}$ , nM])

| Kinase            | G-7744 | P605-15   | FN486 | bruinib | PF-112 | Kinase            | G-7744 | P605-15   | FN486    | bruinib    | PF-112 |
|-------------------|--------|-----------|-------|---------|--------|-------------------|--------|-----------|----------|------------|--------|
| MARK3             | 8      | 33        | 8     | 7       | 5      | PKC_alpha         | 5      | 61        | 5        | 7          | 10     |
| MARK4             | 3      |           |       |         |        | PKC_beta1         | 4      | -2        | 6        | 18         | 11     |
| MEK1              | 0      | 20        | 4     | 40      | 58     | PKC_beta2         | -1     |           |          |            |        |
| MEK2              | 5      |           |       |         |        | PKC_delta         | 1      | 7         | 39       | 5          | -2     |
| MEK3              | 2      | 39        | 11    | 6       | 1      | PKC_epsilon       | 1      | 16        | 21       | 4          | 3      |
| MEKK2             | -2     | 12        | 6     | 35      | 26     | PKC_eta           | 20     | 9         | -2       | 7          | 6      |
| MEKK3             | 3      |           |       |         |        | PKC_gamma         | -1     |           |          |            |        |
| MELK              | 5      | 16        | 8     | -1      | -5     | PKC_theta         | 6      |           |          |            |        |
| Mer               | 1      | 36        | 6     | 31      | 5      | PKC_zeta          | -5     | 3         | 13       | 8          | 6      |
| Met               | 9      | 8         | 2     | 12      | 9      | PKD1              | 10     | 5         | -5       | 11         | 5      |
| MeT(1250T)        | 5      |           |       |         |        | PKD2              | 2      | 59 [820]  | 11       | 11         | 15     |
| Mink1             | 11     | 56        | 0     | 21      | 26     | PRD3              | 0      |           |          |            |        |
| MKK5              | 11     | 5         | 9     | -1      | -2     | PRK1_alpha        | 7      |           |          |            |        |
| MKK6(S207E,T211E) | -4     |           |       |         |        | PKG2              | 4      | 5         | 5        | 4          | 2      |
| MKNK1             |        | 8         | -3    | 10      | -2     | PKG2              | 2      |           |          |            |        |
| MKNK2             |        | 5         | 4     | 18      | 3      | PLK1              | 4      | 0         | 4        | 7          | 2      |
| MLK1              | -3     | 70        | -6    | 2       | -2     | PLK2              | 21     | 2         | 6        | 3          | -1     |
| MLK2              | -5     | 31        | 6     | 10      | 3      | PLK3              | -15    | 17        | 10       | 16         | 5      |
| MLK3              | -4     |           |       |         |        | PRAK              | 3      | 2         | 7        | 1          | 4      |
| MRCK_alpha        | 6      | 5         | -9    | 3       | -4     | PRK1              | 1      | 10        | 13       | 11         | 6      |
| MRCK_beta         | 15     |           |       |         |        | PRKAA1            | 1      | 27        | 7        | 6          | 2      |
| MSK1              | 2      | 5         | 9     | 1       | 7      | PRKAA2            | 5      |           |          |            |        |
| MSK2              | 3      |           |       |         |        | PrkX              | 1      | 8         | 3        | 4          | 2      |
| MSSK1             | 9      | 2         | 3     | 3       | -2     | RAF1(Y340D,Y341D) | 10     | 4         | 11       | 56         | 1      |
| MST1              | -4     | 24        | -1    | 22      | 11     | Ret               | 14     | 57        | 32       | 87         | 54     |
| MST2              | 23     | 24        | -7    | 16      | 7      | RIPK2             | 1      | 7         | 7        | 99 [16]    | 85     |
| MST3              | 3      | 4         | 5     | 14      | 20     | ROCK1             | 1      | 22        | -1       | 5          | 1      |
| MST4              | 7      | 17        | 10    | 16      | 12     | ROCK2             | 1      | 6         | -3       | -1         | 2      |
| mTOR              | -4     | 10        | 2     | 28      | 7      | Ron               | 11     | 2         | 20       | 4          | 0      |
| MuSK              | 7      | 43        | 55    | -12     | 2      | Ros               | 7      | 50        | 7        | -1         | 3      |
| MYLK(smMLCK)      | -4     | 9         | 3     | -3      | 1      | Rse               | 4      | 31        | 10       | 7          | 5      |
| MYLK2(smMLCK)     | 14     |           |       |         |        | Rsk1              | -1     | 16        | 5        | 5          | 1      |
| MYLK3(caMLCK)     | -8     | 26        | 13    | 6       | 13     | Rsk2              | 1      | 15        | 30       | -7         | 1      |
| NEK1              | 5      | 2         | 6     | -6      | 10     | Rsk3              | 3      | 12        | 9        | 7          | 3      |
| NEK2              | 4      |           |       |         |        | Rsk4              | 9      |           |          |            |        |
| NEK4              | 2      | 6         | 10    | 4       | 1      | SGK1              | -11    | 4         | -7       | 4          | 6      |
| NEK6              | 4      | 0         | 3     | 5       | 6      | SGK2              | 3      | -2        | 10       | -1         | 2      |
| NEK7              | 1      |           |       |         |        | SGK3              | 5      | 10        | 28       | -1         | 3      |
| NEK9              | -1     | -4        | 0     | 2       | -1     | SIK2              | 4      | 49        | 9        | 0          | 5      |
| NIK               | -3     |           |       |         |        | SLK               | 4      | 9         | 8        | 6          | 4      |
| NLK               | -10    | -5        | 6     | 5       | 17     | SPHK1             | 5      | 16        | 17       | 9          | 0      |
| p38_alpha         | 3      | 7         |       |         |        | SPHK2             | -1     |           |          |            |        |
| p38_alpha(direct) | -2     | 1         | -3    | 6       | 10     | Src               | 39     | 70 [349]  | 99 [122] | 98 [26.1]  | 45     |
| p38_beta          | 6      | 2         | 8     | 6       | 22     | Src_N1            | 21     |           |          |            |        |
| p38_delta         | 5      | 7         | 6     | 14      | 3      | Srm               | -3     | -3        | 33       | 105 [5.78] | 15     |
| p38_gamma         | 11     | 5         | 1     | 2       | 5      | SRPK1             | 6      | 3         | 0        | 3          | 3      |
| p70S6K            | 5      | 14        | 4     | -1      | -3     | SRPK2             | -3     | 8         |          |            |        |
| PAK1              | 9      | 10        | -1    | 9       | 5      | STK16             | -3     | -1        | -2       | 2          | 3      |
| PAK2              | 6      |           |       |         |        | STK33             | 2      | 29        | 6        | 14         | 3      |
| PAK3              | -3     | 4         | 16    | 19      | 6      | Syk               | 0      | 99 [1.31] | 8        | 2          | 15     |
| PAK4              | -6     | 97 [62.9] | 5     | 6       | 3      | TAK1-TAB1         | 1      | 35        | 8        | 2          | 2      |
| PAK6              | -7     | 35        | 10    | 2       | 2      | TAO1              | 6      | 9         | -10      | -1         | -5     |
| PAK7              | 4      |           |       |         |        | TAO3              | 1      |           |          |            |        |
| PAK8              | 21     | 79        | 8     | 1       | 1      | TBK1              | 4      | 3         | 8        | 8          | 5      |
| PDGFR_a           | 5      | 23        | 3     | 50      | 4      | TEC               | 15     | 16        | 90 [283] | 100 [10.2] | 91     |
| PDGFR_a(D842V)    | 0      |           |       |         |        | TGFBR1            |        | -3        | 7        | 32         | 7      |
| PDGFR_a(T674I)    | -4     |           |       |         |        | Tie2              | 45     | 7         | -5       | 57         | 30     |
| PDGFR_a(V561D)    | 6      |           |       |         |        | TNK2              | 0      | 16        | 40       | 86 [167]   | 4      |
| PDGFR_b           | 3      | 20        |       |         |        | TrkA              | 11     | 68 [309]  | 30       | 24         | 19     |
| PDK1              | 19     |           |       |         |        | TrkB              | 6      | 47        | 10       | 11         | 6      |
| PDK1(direct)      | 14     | 6         | 3     | 3       | 2      | TrkC              | -8     |           |          |            |        |
| Phk_gamma1        | 6      | 9         | -5    | 3       | 3      | TSSK1             | 6      | 83        | 3        | 4          | 7      |
| Phk_gamma2        | -1     | 19        | 3     | 4       | 2      | TSSK2             | 2      |           |          |            |        |
| PI3K-A            | 14     | -2        | -4    | 5       | 4      | TTK               | -3     | 26        | 8        | 10         | 13     |
| PI3K-D            | -5     |           |       |         |        | TXK               |        | 51        | 7        | 93 [2.52]  | 76     |
| PI3K-G            | -1     | -10       | 1     | -9      | -9     | TYK2              | 3      | 30        | 6        | 2          | 3      |
| PI3K2a            | 0      |           |       |         |        | WEE1              | -4     | -6        | 4        | 1          | 1      |
| PI3K2b            | -3     |           |       |         |        | WNK2              | 2      | 43        | 9        | 10         | 10     |
| PI3KC3_hVPS34     | 0      |           |       |         |        | Yes               | 6      | 65 [553]  | 81 [751] | 99 [4.37]  | 62     |
| PI4Ka             | -5     |           |       |         |        | YSK1              | -13    | 5         | 10       | 6          | 4      |
| PI4Kb             | -4     |           |       |         |        | ZAK               | -1     | -3        | 10       | 27         | 4      |
| PIM1              | 2      | 68        | -4    | 12      | 1      | ZAP-70            | 3      | 10        | 4        | 13         | -1     |
| PIM2              | 1      |           |       |         |        | ZIPK              | -6     | 16        | -1       | 5          | -3     |
| PKA               | -3     | 19        | -1    | 4       | 2      |                   |        |           |          |            |        |

% Inhibition <50 50-80 ≥80 Not Tested

**Invitrogen kinase selectivity.** The selectivity of G-744, P505-15, RN486, Ibrutinib and PF-122 (3-6) was defined at 1  $\mu$ M against a panel of active recombinant human kinases as indicated using the SelectScreen® profiling service and the individual and average % inhibition values were reported. G-744, RN486, Ibrutinib and P505-15 titrations were carried out in order to determine the inhibitor concentration that causes 50% inhibition ( $IC_{50}$ ) for kinases that were inhibited close to or greater than 50% by 1  $\mu$ M of the respective inhibitor. The ATP concentrations used in most of the activity assays were within 2-fold of the experimentally determined apparent Michaelis constant ( $K_m$ ) value for each kinase, whereas the competitive binding tracer concentrations used in the binding assays were generally within 3-fold of the experimentally determined dissociation constant ( $K_d$ ) values.

**Supplemental Table 2: Probes used for the RT-PCR analyses from whole blood of the spontaneous NZB/W\_F1 lupus model presented in Supplemental Fig.6.**

| No | Gene     | Probe         | No | Gene        | Probe         | No | Gene   | Probe         | No  | Gene     | Probe         |
|----|----------|---------------|----|-------------|---------------|----|--------|---------------|-----|----------|---------------|
| 1  | AID      | Mm01184115_m1 | 31 | CX3CR1      | Mm02620111_s1 | 61 | IL15   | Mm00434210_m1 | 91  | NFKBIZ   | Mm00600522_m1 |
| 2  | ANXA7    | Mm00477557_m1 | 32 | CXCL10      | Mm00445235_m1 | 62 | IL1b   | Mm00434228_m1 | 92  | nudE     | Mm00481033_m1 |
| 3  | ATF3     | Mm00476032_m1 | 33 | CXCL13      | Mm04214185_s1 | 63 | IL2    | Mm00434256_m1 | 93  | Oas2     | Mm00460961_m1 |
| 4  | b-actin  | Mm01205647_g1 | 34 | Egr2        | Mm00456650_m1 | 64 | IL21   | Mm00517640_m1 | 94  | Oas3     | Mm00460944_m1 |
| 5  | BAFF     | Mm00446347_m1 | 35 | Egr3        | Mm00516979_m1 | 65 | IL21R  | Mm00600319_m1 | 95  | PAX5     | Mm00435501_m1 |
| 6  | Bank1    | Mm01317729_m1 | 36 | ESPL1       | Mm01313921_m1 | 66 | IL24   | Mm00474102_m1 | 96  | Pla2g4c  | Mm01195718_m1 |
| 7  | BASP1    | Mm02344032_s1 | 37 | Factor B    | Mm00433918_g1 | 67 | IL27   | Mm00461162_m1 | 97  | PRDM1    | Mm00476128_m1 |
| 8  | Blk      | Mm00432077_m1 | 38 | FAM129A     | Mm00452065_m1 | 68 | IL3    | Mm00439631_m1 | 98  | PTPN1    | Mm00448427_m1 |
| 9  | BLNK     | Mm01197846_m1 | 39 | Fcgr3       | Mm00438882_m1 | 69 | IL4    | Mm00445259_m1 | 99  | PTPN22   | Mm00501246_m1 |
| 10 | BMP2K    | Mm00499813_m1 | 40 | FCRL5       | Mm00806273_m1 | 70 | IL5    | Mm00439646_m1 | 100 | RAB21    | Mm00804090_m1 |
| 11 | Btk      | Mm00442712_m1 | 41 | FoxA3       | Mm00484714_m1 | 71 | IL6    | Mm00446190_m1 | 101 | RGS1     | Mm00450170_m1 |
| 12 | C17orf49 | Mm04243238_m1 | 42 | FYB         | Mm01304022_m1 | 72 | IL8    | Mm04208137_m1 | 102 | RPL19    | Mm02601633_g1 |
| 13 | CCDC28B  | Mm00508352_g1 | 43 | GAPDH       | Mm99999915_g1 | 73 | IRAK2  | Mm01184677_m1 | 103 | SGK1     | Mm00441387_g1 |
| 14 | CCL1     | Mm00441236_m1 | 44 | GBP1        | Mm00657086_m1 | 74 | IRAK4  | Mm00459443_m1 | 104 | SLC15a4  | Mm00505709_m1 |
| 15 | CCL2     | Mm00436439_m1 | 45 | GSTP1       | Mm04213618_gH | 75 | Irf4   | Mm00516431_m1 | 105 | SOC1     | Mm01342740_g1 |
| 16 | CCL3     | Mm00441259_g1 | 46 | HCK         | Mm01241463_m1 | 76 | IRF5   | Mm00496477_m1 | 106 | STAT1    | Mm00439531_m1 |
| 17 | CCL4     | Mm00443111_m1 | 47 | HERC5       | Mm01341950_m1 | 77 | IRF7   | Mm00516791_g1 | 107 | STAT4    | Mm00448890_m1 |
| 18 | CD11b    | Mm00434455_m1 | 48 | HPRT1       | Mm01545399_m1 | 78 | IRF8   | Mm00492567_m1 | 108 | STAT6    | Mm01160477_m1 |
| 19 | CD16     | Mm00438882_m1 | 49 | ICAM1       | Mm00516023_m1 | 79 | JUN    | Mm00495062_s1 | 109 | Syk      | Mm01333032_m1 |
| 20 | CD19     | Mm00515420_m1 | 50 | IFNAR1      | Mm00439544_m1 | 80 | Lyn    | Mm01217488_m1 | 110 | TANK     | Mm00495541_m1 |
| 21 | CD38     | Mm01220906_m1 | 51 | IFNB1       | Mm00439552_S1 | 81 | MAP3K8 | Mm00432637_m1 | 111 | Tec      | Mm00443230_m1 |
| 22 | CD40     | Mm00441891_m1 | 52 | IFNg        | Mm01168134_m1 | 82 | MARCKS | Mm02524303_s1 | 112 | TMCC3    | Mm00468135_m1 |
| 23 | CD64     | Mm00438874_m1 | 53 | Ighg1       | Mm01742100_s1 | 83 | MCP1   | Mm00441242_m1 | 113 | TNFa     | Mm00443260_g1 |
| 24 | CD69     | Mm01183378_m1 | 54 | Ighm        | Mm01718955_g1 | 84 | MMP1   | Mm00439491_m1 | 114 | TNFRSF21 | Mm00446361_m1 |
| 25 | CD79A    | Mm00432423_m1 | 55 | Igj         | Mm00461780_m1 | 85 | MMP14  | Mm00485054_m1 | 115 | TRAF1    | Mm00493827_m1 |
| 26 | CD86     | Mm00444543_m1 | 56 | IGSF6       | Mm00459510_m1 | 86 | MMP2   | Mm00439498_m1 | 116 | TRAF6    | Mm00493836_m1 |
| 27 | CLIP2    | Mm00515608_m1 | 57 | IL-1RA      | Mm00446186_m1 | 87 | Mx1    | Mm00487796_m1 | 117 | ZC3H12A  | Mm00462535_g1 |
| 28 | CMPK2    | Mm00469582_m1 | 58 | IL10        | Mm00439614_m1 | 88 | NCF2   | Mm00726636_s1 |     |          |               |
| 29 | CSF1     | Mm00432686_m1 | 59 | IL12b (p40) | Mm00434174_m1 | 89 | NFKBIA | Mm00477800_g1 |     |          |               |
| 30 | CSFR1    | Mm01266652_m1 | 60 | IL13RA1     | Mm00446726_m1 | 90 | NFKBIE | Mm01269649_m1 |     |          |               |
